# Supplementary material for: Structure of the <em>Drosophila melanogaster </em>Flight Muscle Myosin Filament at 4.7 Å Resolution Reveals New Details of Non-myosin Proteins
Source: Preprints.org preprint supplement (doi:10.20944/preprints202309.0281.v1), 2023-09-05
Supplement: Supplementary file 1 [file Abbasi Yeganeh et al, 2023,Supplemental Table 1_helical paramters.xlsx]

## Sheet: Sheet1
	Lethocerus	Drosophila	Bombus	Drosophila
Resolution (Å)	6	7	6	4.7
Helical rise (Å)	147.038	148.826	147.533	145.357
Helical twist (˚)	33.98	33.86	34.05	33.8076
Reference	Hu et al., 2016	Daneshparvar et al., 2020	Li et al., 2022	this work
