# Supplementary material for: Structure of the <em>Drosophila melanogaster </em>Flight Muscle Myosin Filament at 4.7 Å Resolution Reveals New Details of Non-myosin Proteins
Source: Preprints.org preprint supplement (doi:10.20944/preprints202309.0281.v1), 2023-09-05
Supplement: Supplementary file 2 [file Abbasi Yeganeh et al, 2023,Supplemental Table 2_flightin-myosin interactions.xlsx]

## Sheet: Sheet1
Flightin				Myosin				Interaction		color scheme:
region	residue name	residue number	atom	residue name	residue number	atom	distance (Å)			Salt bridge
Extended-1	TYR	75	OH	SER	1260.J	OG	3.113	Hydrogen bond		Hydrogen bond
	TYR	75	OH	GLN	1259.J	OE1	3.142	Hydrogen bond		Hydrophobic interaction
	TYR	75	OH	ASP	1263.J	OD2	3.178	Hydrogen bond		ionic interaction
	LEU	81	CD2	LEU	1550.G	CD1	2.612	Hydrophobic interaction		Tyrosin-rich region
	LEU	81	CB	ALA	1546.G	CB	3.936	Hydrophobic interaction
	TYR	82	OH	ASN	1239.j	OD1	2.298	Hydrogen bond
	TYR	82	OH	ALA	1243.j	CB	4.438	Hydrophobic interaction
Extended-2	HIS	84	NE2	GLU	1547.G	OE2	4.339	ionic interaction
	VAL	86	CG2	LEU	1550.g	CD1	4.027	Hydrophobic interaction
	VAL	86	CG1	LEU	1550.G	CD1	5.085	Hydrophobic interaction
	ARG	87	NH2	GLU	1554.g	OE1	4.008	Salt bridge
	LEU	91	CD2	ALA	1747.e	CB	1.928	Hydrophobic interaction
	GLN	92	OE1	LYS	1753.E	NZ	3.746	Hydrogen bond
	TYR	93	OH	GLU	1848.d	OE1	4.18	Hydrogen bond
Helix-1	TYR	95	OH	GLN	1852.d	OE1	4.103	Hydrogen bond
	TYR	95	OH	LEU	1849.d	CD2	4.005	Hydrophobic interaction
	TYR	97	OH	LYS	1756.E	NZ	5.17	Hydrogen bond
	TYR	99	OH	GLU	1855.d	OE2	2.226	Hydrogen bond
	TYR	103	OH	ASP	1766.e	OD1	3.457	Hydrogen bond
	TYR	104	OH	ALA	1761.e	CB	3.672	Hydrophobic interaction
	TYR	104	OH	MET	1758.e	O	2.668	Hydrophobic interaction
	VAL	107	CG2	LEU	1764.E	CD1	5.003	Hydrophobic interaction
	ILE	111	CD1	LEU	1764.E	CD2	4.46	Hydrophobic interaction
Loop-1	ARG	124	NH1	GLU	1577.g	OE2	3.931	Salt bridge
	THR	127	OG1	ARG	1573.g	NH1	3.924	Hydrogen bond
Helix-2	ALA	129	CB	MET	1863.d	CE	4.288	Hydrophobic interaction
	GLU	130	OE1	ARG	1573.g	NH1	5.731	ionic interaction
	ARG	131	NH2	GLN	1566.g	NE2	3.954	Hydrogen bond
	ARG	134	NH2	GLN	1864.D	NE2	5.494	Hydrogen bond
	ARG	136	NH1	GLU	1861.D	OE1	5.314	ionic interaction
	ARG	136	NH2	ASN	1859.d	ND2	2.945	Hydrogen bond
	ASN	137	OD1	GLN	1864.D	NE2	1.701	Hydrogen bond
	ASP	144	OD1	ARG	1857.D	NH2	3.815	Salt bridge
